# Supplementary material for: Sex, Atrial Fibrillation, and Long-Term Mortality After Cardiac Surgery
Source: PubMed Central journal article supplement (PMC11339658; doi:10.1001/jamanetworkopen.2024.26865), 2024-08-21
Supplement: jamanetwopen-e2426865-s001.pdf [file jamanetwopen-e2426865-s001.pdf]

## Supplemental Online Content

Karamnov S, Sarkisian N, Wollborn J, et al. Sex, atrial fibrillation, and long-term mortality after cardiac surgery. *JAMA Netw Open*. 2024;7(8):e2426865. doi:10.1001/jamanetworkopen.2024.26865

**eTable 1.** Cox Regression Analysis for Mortality Following Open Heart Surgery Excluding COVID-19 Period

**eTable 2.** Multivariable Logistic Regression Analysis for the Occurrence of Postoperative Atrial Fibrillation After Open Heart Surgery (Including Only Significant Covariates)

**eTable 3.** Cox Regression Analysis for Mortality Following Open Heart Surgery (Including Only Significant Covariates)

**eTable 4.** Predicted Mortality Probabilities at Different Time Points Based on Sex and Postoperative Atrial Fibrillation, Based on Cox Regression Analysis for Mortality Following Open Heart Surgery

This supplemental material has been provided by the authors to give readers additional information about their work.

**eTable 1.** Cox Regression Analysis Predicting Mortality Following Open Heart Surgery Excluding COVID-19 Period<sup>a</sup>

| Characteristic                  | HR            | (95% CI)    | P value |
|---------------------------------|---------------|-------------|---------|
| poAF                            | 1.18          | (1.11-1.25) | <0.001  |
| Female sex                      | 1.09          | (1.02-1.18) | 0.02    |
| poAF and female sex interaction | 1.12          | (1.01-1.23) | 0.04    |
| Age/10                          | 0.62          | (0.50-0.76) | <0.001  |
| (Age/10) squared                | 1.08          | (1.06-1.09) | <0.001  |
| BMI/10                          | 0.49          | (0.41-0.60) | <0.001  |
| (BMI/10) squared                | 1.11          | (1.08-1.15) | <0.001  |
| Race                            |               |             |         |
| Asian                           | 0.83          | (0.64-1.09) | 0.18    |
| Black                           | 1.03          | (0.86-1.23) | 0.73    |
| Hispanic                        | 0.86          | (0.72-1.03) | 0.1     |
| White                           | 1 [Reference] |             | NA      |
| Other <sup>b</sup>              | 0.88          | (0.70-1.11) | 0.27    |
| History of AF                   | 1.13          | (1.00-1.28) | 0.06    |
| Hypertension                    | 1.17          | (1.09-1.25) | <0.001  |
| Hyperlipidemia                  | 0.87          | (0.81-0.93) | <0.001  |
| History of MI                   |               |             |         |
| None                            | 1 [Reference] |             | NA      |
| Past                            | 1.23          | (1.15-1.31) | <0.001  |
| Recent                          | 1.22          | (1.14-1.31) | <0.001  |
| CHF                             | 1.44          | (1.36-1.52) | <0.001  |
| PVD                             | 1.42          | (1.34-1.51) | <0.001  |
| Diabetes                        | 1.52          | (1.44-1.60) | <0.001  |
| History of severe COPD          | 1.95          | (1.74-2.19) | <0.001  |
| Smoking status                  |               |             |         |
| Never                           | 1 [Reference] |             | NA      |
| Past                            | 1.20          | (1.14-1.27) | <0.001  |
| Current                         | 1.40          | (1.28-1.53) | <0.001  |
| Log creatinine level            | 1.63          | (1.47-1.80) | <0.001  |
| Log creatinine level squared    | 1.22          | (1.15-1.30) | <0.001  |
| Procedure                       |               |             |         |
| CABG                            | 1 [Reference] |             | NA      |
| AVR                             | 1.10          | (1.03-1.19) | 0.007   |
| MVR                             | 0.89          | (0.80-1.00) | 0.04    |
| CABG and AVR                    | 1.27          | (1.18-1.36) | <0.001  |
| CABG and MVR                    | 1.31          | (1.17-1.47) | <0.001  |
| Emergent surgery                | 1.31          | (1.15-1.49) | <0.001  |
| Hospital 2                      | 0.81          | (0.77-0.85) | <0.001  |

|                                                     |      |             |      |
|-----------------------------------------------------|------|-------------|------|
| ACE inhibitors or ARB within 48 h preceding surgery | 1.02 | (0.95-1.09) | 0.58 |
| B-blockers within 24 h preceding surgery            | 1.00 | (0.94-1.05) | 0.86 |

Abbreviations: ACE, angiotensin-converting enzyme; AF, atrial fibrillation; ARB, angiotensin II receptor blockers; AVR, aortic valve replacement; BMI, body mass index; CABG, coronary artery bypass graft surgery; CHF, congestive heart failure; COPD, chronic obstructive pulmonary disease; HR, hazard ratio; MI, myocardial infarction; MVR, mitral valve replacement; NA, not applicable; poAF, postoperative atrial fibrillation; PVD, peripheral vascular disease.

<sup>a</sup> Data from a multi-institutional database with surgery dates from January 1, 2002, through October 1, 2016, and mortality follow up until March 1, 2020. Harrell C concordance index = 0.74.

<sup>b</sup> The other race category included American Indian, Alaska Native, Native Hawaiian, or Other Pacific Islander individuals as well as those who explicitly identified as other and those who identified as 2 or more races.

**eTable 2.** Multivariable Logistic Regression Analysis for the Occurrence of Postoperative Atrial Fibrillation After Open Heart Surgery (Including Only Significant Covariates)<sup>a</sup>

| Characteristic                           | OR            | (95% CI)    | P value |
|------------------------------------------|---------------|-------------|---------|
| Female sex                               | 0.86          | (0.80-0.92) | <0.001  |
| Age/10                                   | 2.24          | (1.78-2.83) | <0.001  |
| (Age/10) squared                         | 0.97          | (0.96-0.99) | 0.004   |
| Race                                     |               |             |         |
| Asian                                    | 0.78          | (0.60-1.01) | 0.06    |
| Black                                    | 0.65          | (0.51-0.82) | <0.001  |
| Hispanic                                 | 0.76          | (0.60-0.95) | 0.02    |
| White                                    | 1 [Reference] |             | NA      |
| Other <sup>b</sup>                       | 1.05          | (0.80-1.36) | 0.74    |
| History of AF                            | 1.71          | (1.44-2.02) | <0.001  |
| Hypertension                             | 1.19          | (1.10-1.28) | <0.001  |
| History of MI                            |               |             |         |
| None                                     | 1 [Reference] |             | NA      |
| Past                                     | 1.08          | (0.99-1.18) | 0.08    |
| Recent                                   | 1.10          | (1.01-1.21) | 0.03    |
| CHF                                      | 1.13          | (1.05-1.21) | 0.001   |
| Diabetes                                 | 0.95          | (0.89-1.02) | 0.16    |
| History of severe COPD                   | 1.29          | (1.07-1.55) | 0.007   |
| Smoking                                  |               |             |         |
| Never                                    | 1 [Reference] |             | NA      |
| Past                                     | 1.08          | (1.01-1.15) | 0.02    |
| Current                                  | 1.02          | (0.92-1.13) | 0.70    |
| Log creatinine level                     | 1.20          | (1.10-1.31) | <0.001  |
| Procedure                                |               |             |         |
| CABG                                     | 1 [Reference] |             | NA      |
| AVR                                      | 1.66          | (1.53-1.80) | <0.001  |
| MVR                                      | 2.77          | (2.48-3.10) | <0.001  |
| CABG and AVR                             | 1.60          | (1.46-1.75) | <0.001  |
| CABG and MVR                             | 2.54          | (2.18-2.95) | <0.001  |
| Emergent surgery                         | 1.51          | (1.27-1.79) | <0.001  |
| Hospital 2                               | 1.38          | (1.30-1.47) | <0.001  |
| β-blockers within 24 h preceding surgery | 1.08          | (1.01-1.15) | 0.02    |

Abbreviations: AF, atrial fibrillation; AVR, aortic valve replacement; CABG, coronary artery bypass graft surgery; CHF, congestive heart failure; COPD, chronic obstructive pulmonary disease; MI, myocardial infarction; MVR, mitral valve replacement; NA, not applicable; OR, odds ratio.

<sup>a</sup> Data from multi-institutional database with surgery dates from January 1, 2002, through October 1, 2016. McFadden pseudo R<sup>2</sup> = 0.082; area under the curve, 0.692.

<sup>b</sup> The other race category included American Indian, Alaska Native, Native Hawaiian, or Other Pacific Islander individuals as well as those who explicitly identified as other and those who identified as 2 or more races.

**eTable 3.** Cox Regression Analysis for Mortality Following Open Heart Surgery (Including Only Significant Covariates)<sup>a</sup>

| Characteristic                  | HR            | (95% CI)    | P value |
|---------------------------------|---------------|-------------|---------|
| poAF                            | 1.17          | (1.11-1.24) | <0.001  |
| Female sex                      | 1.07          | (1.00-1.15) | 0.06    |
| poAF and female sex interaction | 1.12          | (1.01-1.23) | 0.03    |
| Age/10                          | 0.66          | (0.54-0.80) | <0.001  |
| (Age/10) squared                | 1.07          | (1.06-1.09) | <0.001  |
| BMI/10                          | 0.53          | (0.44-0.63) | <0.001  |
| (BMI/10) squared                | 1.11          | (1.08-1.14) | <0.001  |
| History of AF                   | 1.14          | (1.01-1.28) | 0.03    |
| Hypertension                    | 1.16          | (1.09-1.24) | <0.001  |
| Hyperlipidemia                  | 0.88          | (0.83-0.94) | <0.001  |
| History of MI                   |               |             |         |
| None                            | 1 [Reference] |             | NA      |
| Past                            | 1.24          | (1.17-1.32) | <0.001  |
| Recent                          | 1.22          | (1.14-1.30) | <0.001  |
| CHF                             | 1.43          | (1.36-1.51) | <0.001  |
| PVD                             | 1.42          | (1.34-1.50) | <0.001  |
| Diabetes                        | 1.51          | (1.43-1.59) | <0.001  |
| History of severe COPD          | 1.87          | (1.67-2.09) | <0.001  |
| Smoking status                  |               |             |         |
| Never                           | 1 [Reference] |             | NA      |
| Past                            | 1.20          | (1.14-1.27) | <0.001  |
| Current                         | 1.44          | (1.33-1.56) | <0.001  |
| Log creatinine level            | 1.60          | (1.46-1.77) | <0.001  |
| Log creatinine level squared    | 1.22          | (1.15-1.30) | <0.001  |
| Procedure                       |               |             |         |
| CABG                            | 1 [Reference] |             | NA      |
| AVR                             | 1.13          | (1.06-1.21) | <0.001  |
| MVR                             | 0.92          | (0.82-1.02) | 0.11    |
| CABG and AVR                    | 1.28          | (1.20-1.37) | <0.001  |
| CABG and MVR                    | 1.30          | (1.17-1.45) | <0.001  |
| Emergent surgery                | 1.31          | (1.16-1.49) | <0.001  |
| Hospital 2                      | 0.81          | (0.77-0.85) | <0.001  |

Abbreviations: AF, atrial fibrillation; AVR, aortic valve replacement; BMI, body mass index; CABG, coronary artery bypass graft surgery; CHF, congestive heart failure; COPD, chronic obstructive pulmonary disease; HR, hazard ratio; MI, myocardial infarction; MVR, mitral valve replacement; NA, not applicable; poAF, postoperative atrial fibrillation; PVD, peripheral vascular disease.

<sup>a</sup> Data from a multi-institutional database with surgery dates from January 1, 2002, through October 1, 2016, and mortality follow up until December 1, 2022. Harrell C concordance index = 0.74.

**eTable 4.** Predicted Mortality Probabilities (%) at Different Timepoints Based on Sex and Postoperative Atrial Fibrillation, Based on Cox Regression Analysis for Mortality Following Open Heart Surgery<sup>a</sup>

| Censoring Timepoint | Patient Sample Censored/Deceased (%) | Predicted Probability of Mortality (%) |          |               |            |
|---------------------|--------------------------------------|----------------------------------------|----------|---------------|------------|
|                     |                                      | Men no poAF                            | Men poAF | Women no poAF | Women poAF |
| 30 days             | 25.2                                 | 1.0                                    | 1.2      | 1.1           | 1.4        |
| 5 years             | 51.9                                 | 11.6                                   | 13.5     | 12.4          | 15.9       |
| 10 years            | 78.8                                 | 31.9                                   | 36.3     | 33.7          | 41.7       |

Abbreviation: poAF, postoperative atrial fibrillation.

<sup>a</sup> Data from multi-institutional database with surgery dates from January 1, 2002, through October 1, 2016, and mortality follow up until December 1, 2022. All the covariates held at their sample means.
