# Supplementary material for: Sex, Atrial Fibrillation, and Long-Term Mortality After Cardiac Surgery
Source: PubMed Central journal article supplement (PMC11339658; doi:10.1001/jamanetworkopen.2024.26865), 2024-08-21
Supplement: jamanetwopen-e2426865-s002.pdf [file jamanetwopen-e2426865-s002.pdf]

## Data Sharing Statement

Karamnov. Sex, Atrial Fibrillation, and Long-Term Mortality After Cardiac Surgery. *JAMA Netw Open*. Published August 21, 2024. doi:10.1001/jamanetworkopen.2024.26865

### Data

**Data available:** No

### Additional Information

**Explanation for why data not available:** Data was obtained retrospectively after IRB approval with a waiver of informed consent. As patients did not consent for the data to be shared, we cannot share the data.
